# Supplementary material for: Acid Sphingomyelinase Deficiency Ameliorates Farber Disease
Source: MDPI journal article supplement (doi:10.3390/ijms20246253), 2019-12-11
Supplement: s1 [file s1]

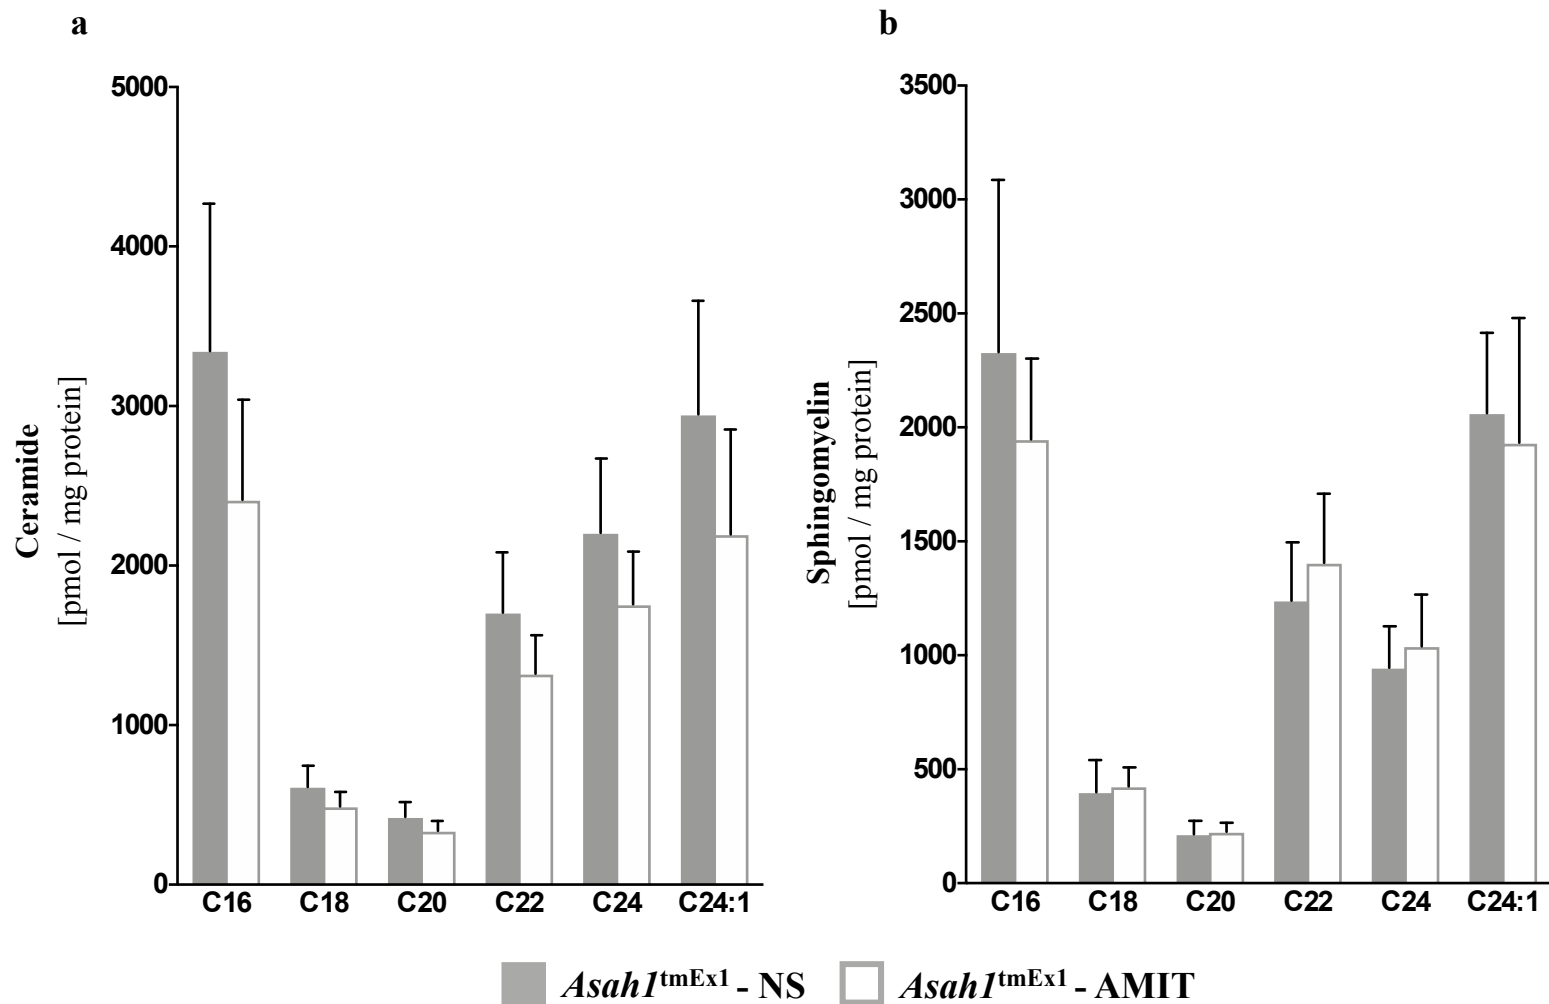

**Supplementary Figure 2.** Effect of amitriptyline treatment on different ceramide and sphingomyelin species in acid ceramidase deficient mice. **(a-b)** The effects of amitriptyline treatment on ceramides **(a)** and sphingomyelins **(b)** of different chain lengths were analyzed by liquid chromatography tandem-mass spectrometry (LC-MS/MS) of snap-frozen spleen samples of Ac deficient mice. n = 3-5 mice/group. No significant differences were detected compared to *Asah1*<sup>tmEx1</sup> - NS (Student t test). The legend at the bottom of the figure applies to both **(a)** and **(b)**.
